# Supplementary material for: Alkali earth MOx (x = 6, 7, 9, 12) polyhedra tuned cadmium selenites with different dimensions and diverse SeO32− coordinations
Source: Royal Society of Chemistry journal article supplement (doi:10.1039/c7ce01461a), 2017-01-01
Supplement: c7ce01461a2.pdf [file c7ce01461a2.pdf]

## Electronic supplementary information (ESI)

### Alkali Earth MO<sub>x</sub> (x=6, 7, 9, 12) PolyhedraTuned Cadmium Selenites with Different Dimensions and Diverse SeO<sub>3</sub><sup>2-</sup> Coordinations

Ying-Jie Jia, Yi-Gang Chen\*, Xiao-Ni Yao, Xian-Ming Zhang\*

Table S1. Atomic coordinates ( $\text{\AA}\times 10^4$ ) and equivalent isotropic displacements parameters ( $\text{\AA}^2\times 10^3$ ) for **1-4**.  $U_{(eq)}$  is defined as one third of the trace of the orthogonalized  $U_{ij}$  tensor.

Table S2. Selected bond distances ( $\text{\AA}$ ) for **1-4**.

Table S3. Energy-Dispersive Spectrometry (EDS) for 1-4.

Fig. S1. The morphology for 1(a), 2(b), 3(c) and 4(d).

Fig. S2. Experimental and simulated PXRD powder patterns of 1(a), 2(b), 3(c) and 4(d).

Fig. S3. Energy-Dispersive Spectrometry (EDS) plot of 1(a), 2(b), 3(c) and 4(d).

Fig. S4. The coordinate environments of the SeO<sub>3</sub><sup>2-</sup> in **1**.

Fig. S5. The coordinate environments of the SeO<sub>3</sub><sup>2-</sup> in **2**.

Fig. S6. The coordinate environments of the SeO<sub>3</sub><sup>2-</sup> in **3**.

Fig. S7. The coordinate environments of the SeO<sub>3</sub><sup>2-</sup> in **4**.

Fig. S8. The TGA and DSC curves of 1(a), 2(b), 3(c) and 4(d).

Fig. S9. PXRD powder patterns for the residual of 1(a), 2(b), 3(c) and 4(d).

Fig.S10. The IR spectrum of 1-4.

Table S1. Atomic coordinates ( $\text{\AA}\times 10^4$ ) and equivalent isotropic displacements parameters ( $\text{\AA}^2\times 10^3$ ) for **1-4**.  $U_{(\text{eq})}$  is defined as one third of the trace of the orthogonalized  $U_{ij}$  tensor.

| <b>(1)</b> |          |          |          |       |
|------------|----------|----------|----------|-------|
| atoms      | x        | y        | z        | U(eq) |
| Cd(1)      | 8659(1)  | 2100(1)  | 4084(1)  | 35(1) |
| Cd(2)      | 3335(1)  | -311(1)  | 1846(1)  | 37(1) |
| Cd(3)      | 2434(1)  | 4045(1)  | 3575(1)  | 34(1) |
| Se(1)      | 665(1)   | 2166(1)  | 6653(1)  | 32(1) |
| Se(2)      | 7067(1)  | 1754(1)  | 1236(1)  | 30(1) |
| Se(3)      | 5174(1)  | 6669(1)  | 3092(1)  | 31(1) |
| Se(4)      | 1299(1)  | 3480(1)  | 902(1)   | 33(1) |
| Mg(1)      | 5000     | 0        | 5000     | 18(1) |
| Mg(2)      | 5000     | 5000     | 0        | 21(1) |
| O(1)       | -261(12) | 563(10)  | 6552(12) | 52(2) |
| O(2)       | -229(11) | 3510(9)  | 5624(9)  | 39(2) |
| O(3)       | 2822(9)  | 1806(9)  | 5197(8)  | 35(2) |
| O(4)       | 6205(11) | 349(9)   | 671(8)   | 37(2) |
| O(5)       | 5347(10) | 3389(9)  | 1662(8)  | 35(2) |
| O(6)       | 6857(10) | 1101(9)  | 3017(8)  | 36(2) |
| O(7)       | 4567(11) | 6885(9)  | 1567(8)  | 36(2) |
| O(8)       | 3577(10) | 5733(9)  | 4473(8)  | 36(2) |
| O(9)       | -927(10) | 4029(10) | 1970(9)  | 42(2) |
| O(10)      | 2226(10) | 4994(9)  | 1189(8)  | 36(2) |
| O(11)      | 1720(11) | 2178(9)  | 2261(8)  | 37(2) |
| O(12)      | 5893(10) | 1357(8)  | 6186(8)  | 33(1) |

**(2)**

| atoms  | x       | y       | z        | U(eq) |
|--------|---------|---------|----------|-------|
| Cd(1)  | 4199(1) | 4602(1) | 1562(1)  | 11(1) |
| Cd(2)  | 476(1)  | 109(1)  | 3023(1)  | 13(1) |
| Se(2)  | 4144(1) | 1844(1) | 3778(1)  | 10(1) |
| Se(1)  | 623(1)  | 2978(1) | 620(1)   | 11(1) |
| Se(3)  | 7512(1) | 4715(1) | 4561(1)  | 10(1) |
| Cd(1') | 7496(1) | 2472(1) | 2331(1)  | 12(1) |
| O(6)   | 4917(3) | 3007(2) | 634(3)   | 15(1) |
| O(7)   | 8793(3) | 3334(2) | 829(3)   | 18(1) |
| O(5)   | 5821(4) | 3938(2) | 3705(3)  | 25(1) |
| O(8)   | 5780(3) | 1417(2) | 3252(3)  | 15(1) |
| O(4)   | 1586(3) | 4204(2) | 1253(3)  | 20(1) |
| O(9)   | 3305(3) | 552(2)  | 3774(3)  | 13(1) |
| O(1)   | 8141(3) | 4166(2) | 6278(3)  | 18(1) |
| O(3)   | 235(3)  | 3138(2) | -1220(3) | 15(1) |
| O(2)   | 8867(4) | 4134(2) | 3779(3)  | 21(1) |
| Ca(1)  | 7496(1) | 2472(1) | 2331(1)  | 12(1) |

**(3)**

| atoms | x         | y       | z        | U(eq) |
|-------|-----------|---------|----------|-------|
| Cd(1) | 7746(2)   | 3529(1) | 3065(1)  | 21(1) |
| Se(1) | 12207(2)  | 2959(1) | 5843(1)  | 21(1) |
| Se(2) | 2296(2)   | 5076(1) | 2833(1)  | 20(1) |
| Sr(1) | 12603(2)  | 3840(1) | 9706(1)  | 16(1) |
| O(1)  | 11800(20) | 2946(5) | 7582(8)  | 35(2) |
| O(2)  | 12902(17) | 1852(5) | 5668(8)  | 27(2) |
| O(3)  | 8618(16)  | 2993(5) | 5194(8)  | 27(2) |
| O(4)  | 2926(16)  | 3941(5) | 2789(8)  | 26(2) |
| O(5)  | -1423(17) | 5025(5) | 2906(10) | 33(2) |
| O(6)  | 2642(18)  | 5335(5) | 1130(8)  | 29(2) |

**(4)**

| atom  | x       | y       | z        | U(eq) |
|-------|---------|---------|----------|-------|
| Cd(1) | 4488(1) | 2500    | 6221(1)  | 12(1) |
| Se(1) | 3671(1) | 7500    | 8693(1)  | 13(1) |
| Se(2) | 4279(1) | 2500    | 1782(1)  | 13(1) |
| Ba(1) | 2831(1) | 7500    | 3797(1)  | 12(1) |
| O(1)  | 3528(2) | 5111(7) | 7192(6)  | 18(1) |
| O(2)  | 4456(3) | 152(8)  | 3320(6)  | 25(1) |
| O(3)  | 3292(4) | 2500    | 1658(10) | 34(2) |
| O(4)  | 2818(4) | 7500    | 9922(9)  | 28(1) |

Table S2. Selected bond distances (Å) for **1-4**.

**(1)**

|               |          |               |          |               |          |
|---------------|----------|---------------|----------|---------------|----------|
| Cd(1)-O(1)#3  | 2.340(9) | Cd(3)-O(2)    | 2.342(8) | Mg(2)-O(7)    | 2.125(7) |
| Cd(1)-O(8)#6  | 2.341(8) | Cd(3)-O(11)   | 2.379(7) | Mg(2)-O(7)#8  | 2.125(7) |
| Cd(1)-O(12)   | 2.477(7) | Cd(3)-O(2)#1  | 2.386(8) | Se(1)-O(2)    | 1.708(7) |
| Cd(1)-O(9)#10 | 2.446(8) | Cd(3)-O(3)    | 2.412(7) | Se(1)-O(1)    | 1.708(8) |
| Cd(1)-O(2)#10 | 2.497(8) | Cd(3)-O(10)   | 2.418(7) | Se(1)-O(3)    | 1.714(7) |
| Cd(1)-O(6)    | 2.426(7) | Mg(1)-O(6)    | 2.154(7) | Se(2)-O(6)    | 1.692(6) |
| Cd(1)-O(8)#6  | 2.341(8) | Mg(1)-O(12)   | 2.087(7) | Se(2)-O(5)    | 1.701(7) |
| Cd(2)-O(11)   | 2.210(8) | Mg(1)-O(3)    | 2.065(7) | Se(2)-O(4)    | 1.719(7) |
| Cd(2)-O(4)#2  | 2.259(7) | Mg(1)-O(3)#3  | 2.065(7) | Se(3)-O(8)    | 1.700(7) |
| Cd(2)-O(12)#3 | 2.294(7) | Mg(1)-O(12)#3 | 2.087(7) | Se(3)-O(7)    | 1.714(7) |
| Cd(2)-O(4)    | 2.323(8) | Mg(1)-O(6)#3  | 2.154(7) | Se(3)-O(12)#6 | 1.753(7) |
| Cd(2)-O(7)#4  | 2.363(7) | Mg(2)-O(10)#8 | 2.087(7) | Se(4)-O(9)    | 1.667(7) |
| Cd(2)-O(1)#5  | 2.392(8) | Mg(2)-O(10)   | 2.087(7) | Se(4)-O(10)   | 1.706(7) |
| Cd(3)-O(8)    | 2.245(7) | Mg(2)-O(5)#8  | 2.088(7) | Se(4)-O(11)   | 1.741(7) |
| Cd(3)-O(5)    | 2.305(7) | Mg(2)-O(5)    | 2.088(7) |               |          |

**(2)**

|              |          |               |          |              |          |
|--------------|----------|---------------|----------|--------------|----------|
| Cd(1)-O(4)   | 2.191(3) | Cd(2)-O(4)#6  | 2.339(3) | Se(1)-O(3)   | 1.685(3) |
| Cd(1)-O(8)#1 | 2.208(8) | Cd(2)-O(7)#4  | 2.405(3) | Se(1)-O(4)   | 1.712(3) |
| Cd(1)-O(5)   | 2.219(3) | Cd(1')-O(8)   | 2.304(2) | Se(2)-O(8)   | 1.693(2) |
| Cd(1)-O(6)   | 2.286(3) | Cd(1')-O(7)   | 2.304(3) | Se(2)-O(6)#3 | 1.687(3) |
| Cd(1)-O(9)#1 | 2.513(2) | Cd(1')-O(6)   | 2.362(3) | Se(2)-O(9)   | 1.719(3) |
| Cd(1)-O(9)#2 | 2.522(3) | Cd(1')-O(1)#2 | 2.363(3) | Se(3)-O(1)   | 1.685(3) |
| Cd(2)-O(3)#3 | 2.274(3) | Cd(1')-O(3)#9 | 2.411(3) | Se(3)-O(5)   | 1.693(3) |
| Cd(2)-O(2)#4 | 2.287(3) | Cd(1')-O(2)   | 2.510(3) | Se(3)-O(2)   | 1.701(3) |
| Cd(2)-O(1)#5 | 2.318(3) | O(1)-Ca(1)#3  | 2.363(3) |              |          |
| Cd(2)-O(9)   | 2.336(2) | Se(1)-O(7)#7  | 1.678(3) |              |          |

**(3)**

|              |          |              |          |              |          |
|--------------|----------|--------------|----------|--------------|----------|
| Cd(1)-O(3)   | 2.211(7) | Sr(1)-O(2)#5 | 2.569(7) | Sr(1)-O(5)#9 | 3.057(9) |
| Cd(1)-O(4)   | 2.258(7) | Sr(1)-O(6)#6 | 2.633(8) | Se(1)-O(1)   | 1.684(8) |
| Cd(1)-O(5)#1 | 2.298(7) | Sr(1)-O(6)#7 | 2.640(8) | Se(1)-O(3)   | 1.702(7) |
| Cd(1)-O(1)#2 | 2.313(8) | Sr(1)-O(2)#8 | 2.722(8) | Se(1)-O(2)   | 1.712(7) |
| Cd(1)-O(2)#2 | 2.371(8) | Sr(1)-O(6)#9 | 2.752(8) | Se(2)-O(5)   | 1.679(8) |
| Cd(1)-O(4)#1 | 2.438(7) | Sr(1)-O(3)#8 | 2.843(8) | Se(2)-O(6)   | 1.691(7) |
| Sr(1)-O(1)   | 2.454(7) | Sr(1)-O(4)#7 | 2.953(8) | Se(2)-O(4)   | 1.740(7) |

## (4)

|               |          |              |          |              |          |
|---------------|----------|--------------|----------|--------------|----------|
| Cd(1)-O(1)#8  | 2.245(4) | Ba(1)-O(1)#3 | 2.902(4) | Ba(1)-O(3)   | 3.214(4) |
| Cd(1)-O(1)    | 2.245(4) | Ba(1)-O(1)#4 | 2.902(4) | Ba(1)-O(3)#7 | 3.214(4) |
| Cd(1)-O(2)#9  | 2.296(4) | Ba(1)-O(1)#5 | 2.978(4) | Se(1)-O(4)   | 1.663(6) |
| Cd(1)-O(2)#10 | 2.296(4) | Ba(1)-O(1)   | 2.978(4) | Se(1)-O(1)   | 1.701(4) |
| Cd(1)-O(2)    | 2.430(5) | Ba(1)-O(4)#6 | 3.039(3) | Se(1)-O(1)#5 | 1.701(4) |
| Cd(1)-O(2)#8  | 2.430(5) | Ba(1)-O(4)#3 | 3.039(3) | Se(2)-O(3)   | 1.640(6) |
| Ba(1)-O(4)#1  | 2.758(6) | Ba(1)-O(2)#7 | 3.078(4) | Se(2)-O(2)#8 | 1.709(4) |
| Ba(1)-O(3)#2  | 2.761(6) | Ba(1)-O(2)#8 | 3.078(4) | Se(2)-O(2)   | 1.709(4) |

Symmetry codes: for: **1** :#1 -x, -y+1, -z+1; #2 -x+1, -y, -z; #3 -x+1, -y, -z+1; #4 x, y-1, z; #5 -x, -y, -z+1; #6 -x+1, -y+1, -z+1; #7 x, y+1, z; #8 -x+1, -y+1, -z; #9 x-1, y, z; #10 x+1, y, z. For **2** : #1 -x+1,y+1/2,-z+1/2; #2 x,-y+1/2,z-1/2; #3 x,-y+1/2,z+1/2; #4 -x+1,y-1/2,-z+1/2; #5 x-1,-y+1/2,z-1/2; #6 -x,y-1/2,-z+1/2; #7 x-1,y,z; #8 -x,y+1/2,-z+1/2; #9 x+1,-y+1/2,z+1/2; #10 x+1,y,z. For **3** : #1 x+1, y, z; #2 x-1/2, -y+1/2, z-1/2; #3 x-1, y, z-1; #4 x, y, z-1; #5 x-1/2, -y+1/2, z+1/2; #6 -x+2, -y+1, -z+1; #7 x+1, y, z+1; #8 x+1/2, -y+1/2, z+1/2; #9 -x+1, -y+1, -z+1; #10 x-1, y, z; #11 x+1/2, -y+1/2, z-1/2. For **4** : #1 x, y, z-1; #2 -x+1/2, -y+1, z+1/2; #3 -x+1/2, -y+1, z-1/2; #4 -x+1/2, y+1/2, z-1/2; #5 x, -y+3/2, z; #6 -x+1/2, -y+2, z-1/2; #7 x, y+1, z; #8 x, -y+1/2, z; #9 -x+1, y+1/2, -z+1; #10 -x+1, -y, -z+1; #11 -x+1/2, -y+2, z+1/2; #12 x, y-1, z; #13 x, y, z+1.

Table S3. Energy-Dispersive Spectrometry (EDS) for 1-4.

## (1)

| Point 1 |          |          |         | Point 2                                                                 |          |          |         |
|---------|----------|----------|---------|-------------------------------------------------------------------------|----------|----------|---------|
| Element | Weight % | Atomic % | Formula | Element                                                                 | Weight % | Atomic % | Formula |
| O K     | 17.15    | 55.61    |         | O K                                                                     | 12.61    | 56.06    |         |
| Mg K    | 3.11     | 5.80     | 1.0     | Mg K                                                                    | 3.10     | 5.59     | 1.0     |
| Se L    | 39.25    | 22.41    | 3.86    | Se L                                                                    | 41.33    | 22.36    | 4.0     |
| Cd L    | 40.49    | 16.18    | 2.79    | Cd L                                                                    | 42.96    | 16.60    | 2.97    |
| Totals  | 100      |          |         | Totals                                                                  | 100      |          |         |
| Point 3 |          |          |         | Average ratio:<br>Mg <sub>1.0</sub> Cd <sub>2.9</sub> Se <sub>3.9</sub> |          |          |         |
| Element | Weight % | Atomic % | Formula |                                                                         |          |          |         |
| O K     | 4.79     | 21.21    |         |                                                                         |          |          |         |
| Mg K    | 3.44     | 10.06    | 1.0     |                                                                         |          |          |         |
| Se L    | 44.50    | 39.08    | 3.88    |                                                                         |          |          |         |
| Cd L    | 47.27    | 29.65    | 2.95    |                                                                         |          |          |         |
| Totals  | 100      |          |         |                                                                         |          |          |         |

## (2)

| Point 1 |          |          |         | Point 2                                                           |          |          |         |
|---------|----------|----------|---------|-------------------------------------------------------------------|----------|----------|---------|
| Element | Weight % | Atomic % | Formula | Element                                                           | Weight % | Atomic % | Formula |
| O K     | 28.12    | 52.58    |         | O K                                                               | 37.95    | 64.46    |         |
| Ca K    | 5.73     | 5.39     | 0.7     | Ca K                                                              | 4.74     | 4.13     | 0.7     |
| Se L    | 32.96    | 23.06    | 2.99    | Se L                                                              | 29.45    | 18.43    | 3.11    |
| Cd L    | 33.19    | 18.97    | 2.46    | Cd L                                                              | 27.86    | 12.98    | 2.20    |
| Totals  | 100      |          |         | Totals                                                            | 100      |          |         |
| Point 3 |          |          |         |                                                                   |          |          |         |
| Element | Weight % | Atomic % | Formula | Average ratio:<br>$\text{Ca}_{0.7}\text{Cd}_{2.3}\text{Se}_{3.1}$ |          |          |         |
| O K     | 28.51    | 68.77    |         |                                                                   |          |          |         |
| Ca K    | 5.29     | 4.89     | 0.7     |                                                                   |          |          |         |
| Se L    | 32.99    | 22.07    | 3.16    |                                                                   |          |          |         |
| Cd L    | 33.21    | 15.58    | 2.23    |                                                                   |          |          |         |
| Totals  | 100      |          |         |                                                                   |          |          |         |

(3)

| Point 1 |          |          |         | Point 2                                                           |          |          |         |
|---------|----------|----------|---------|-------------------------------------------------------------------|----------|----------|---------|
| Element | Weight % | Atomic % | Formula | Element                                                           | Weight % | Atomic % | Formula |
| O K     | 25.34    | 65.40    |         | O K                                                               | 22.9     | 62.39    |         |
| Se L    | 32.67    | 17.07    | 2.15    | Se L                                                              | 32.84    | 18.13    | 2.01    |
| Sr L    | 20.36    | 9.58     | 1.21    | Sr L                                                              | 21.00    | 10.44    | 1.16    |
| Cd L    | 21.63    | 7.95     | 1.0     | Cd L                                                              | 23.26    | 9.03     | 1.0     |
| Totals  | 100      |          |         | Totals                                                            | 100      |          |         |
| Point 3 |          |          |         |                                                                   |          |          |         |
| Element | Weight % | Atomic % | Formula | Average ratio:<br>$\text{Sr}_{1.1}\text{Cd}_{1.0}\text{Se}_{2.0}$ |          |          |         |
| O K     | 26.98    | 67.43    |         |                                                                   |          |          |         |
| Se L    | 31.93    | 16.18    | 1.96    |                                                                   |          |          |         |
| Sr L    | 17.83    | 8.13     | 0.98    |                                                                   |          |          |         |
| Cd L    | 23.25    | 8.26     | 1.0     |                                                                   |          |          |         |
| Totals  | 100      |          |         |                                                                   |          |          |         |

(4)

| Point 1 |          |          |         | Point 2                                      |          |          |         |
|---------|----------|----------|---------|----------------------------------------------|----------|----------|---------|
| Element | Weight % | Atomic % | Formula | Element                                      | Weight % | Atomic % | Formula |
| O K     | 27.83    | 70.98    |         | O K                                          | 12.46    | 47.87    |         |
| Se L    | 28.77    | 14.89    | 2.20    | Se L                                         | 33.33    | 25.86    | 2.22    |
| Cd L    | 18.59    | 6.76     | 1.0     | Cd L                                         | 21.36    | 11.64    | 1.0     |
| Ba L    | 24.78    | 7.37     | 1.09    | Ba L                                         | 32.85    | 14.64    | 1.26    |
| Totals  | 100      |          |         | Totals                                       | 100      |          |         |
| Point 3 |          |          |         |                                              |          |          |         |
| Element | Weight % | Atomic % | Formula | Average ratio:<br>$Ba_{1.2}Cd_{1.0}Se_{2.1}$ |          |          |         |
| O K     | 13.35    | 50.02    |         |                                              |          |          |         |
| Se L    | 30.79    | 23.37    | 1.85    |                                              |          |          |         |
| Cd L    | 23.71    | 12.61    | 1.0     |                                              |          |          |         |
| Ba L    | 32.15    | 14.00    | 1.11    |                                              |          |          |         |
| Totals  | 100      |          |         |                                              |          |          |         |

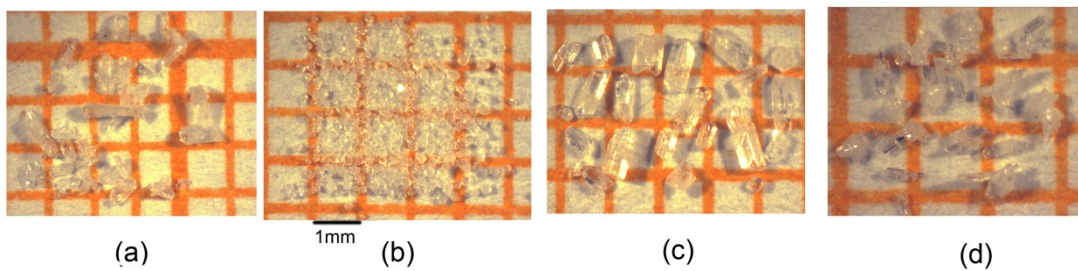

Fig. S1. The morphology for 1(a), 2(b), 3(c) and 4(d).

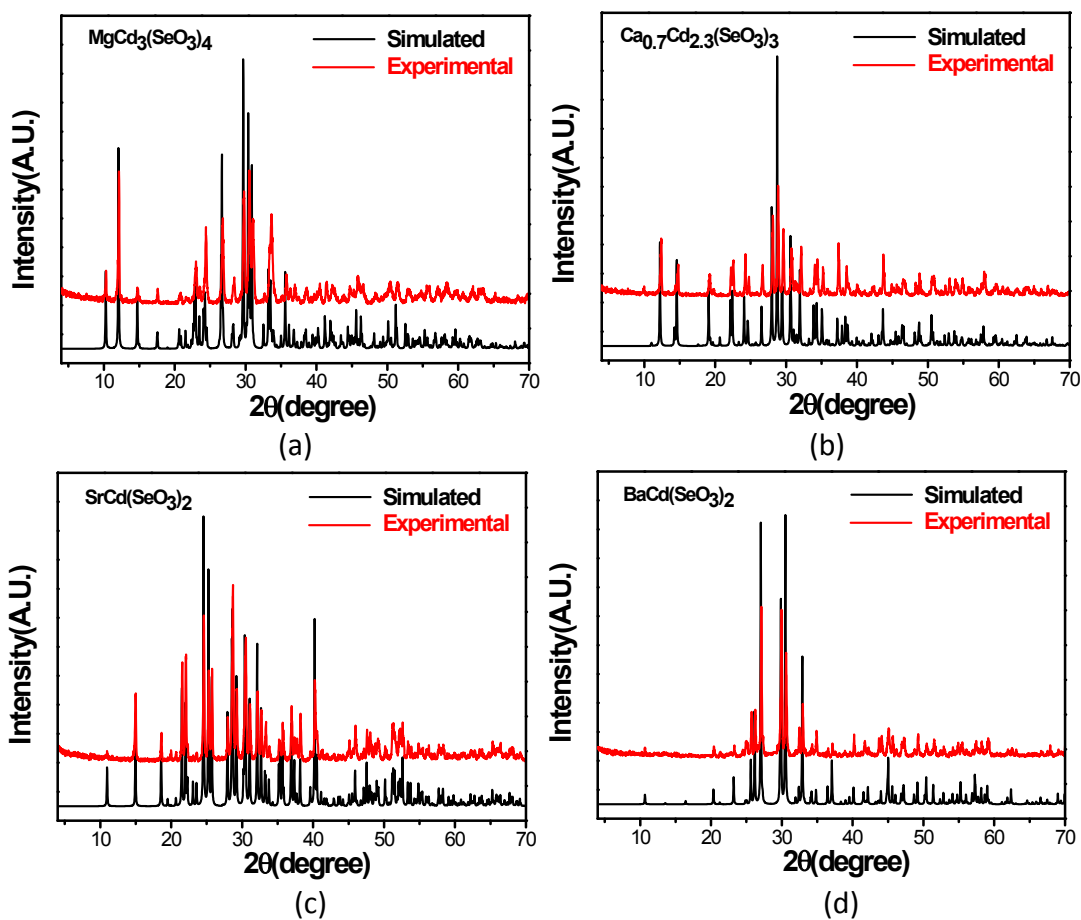

Fig. S2. Experimental and simulated PXRD powder patterns of 1(a), 2(b), 3(c) and 4(d).

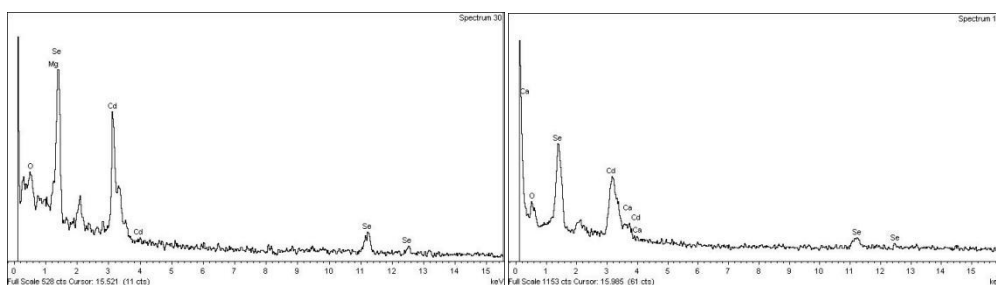



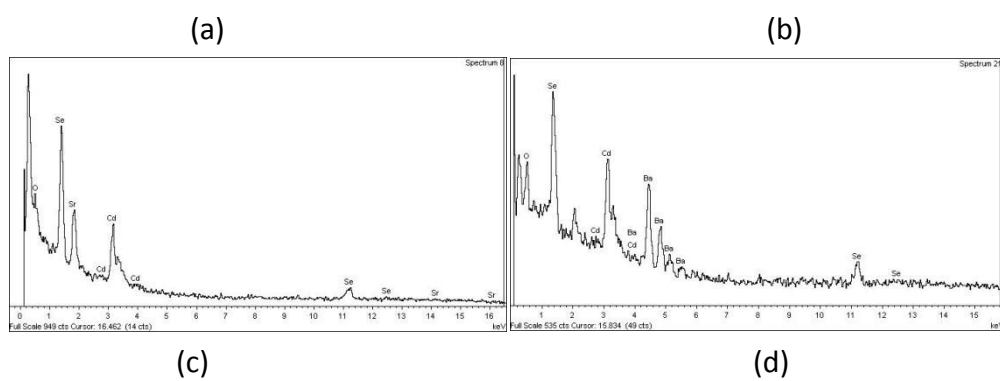

Fig. S3. Energy-Dispersive Spectrometry (EDS) plot of 1(a), 2(b), 3(c) and 4(d).

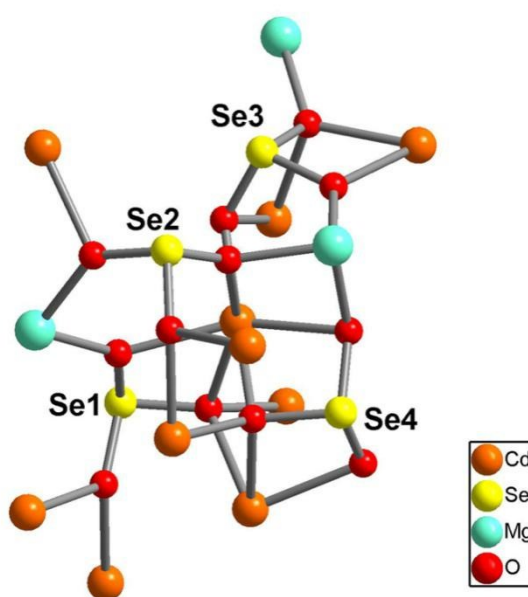

Fig. S4. The coordinate environments of the  $\text{SeO}_3^{2-}$  in **1**.

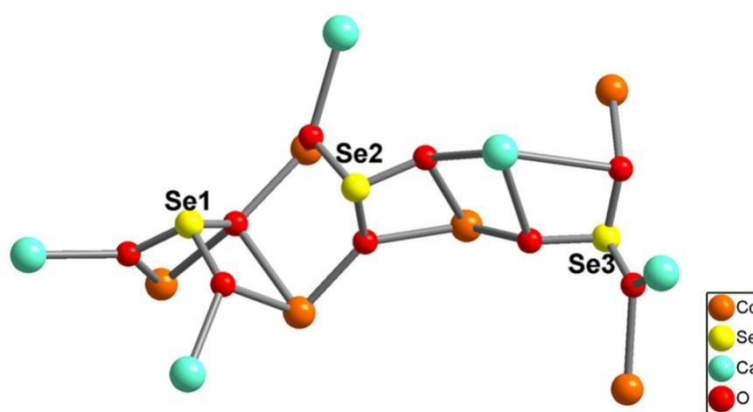

Fig. S5. The coordinate environments of the  $\text{SeO}_3^{2-}$  in **2**.

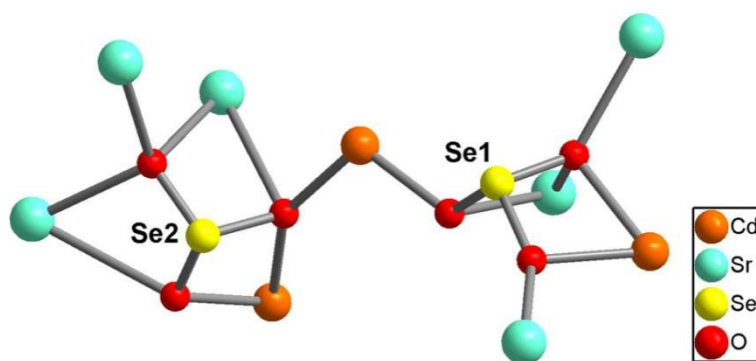

Fig. S6. The coordinate environments of the  $\text{SeO}_3^{2-}$  in **3**.

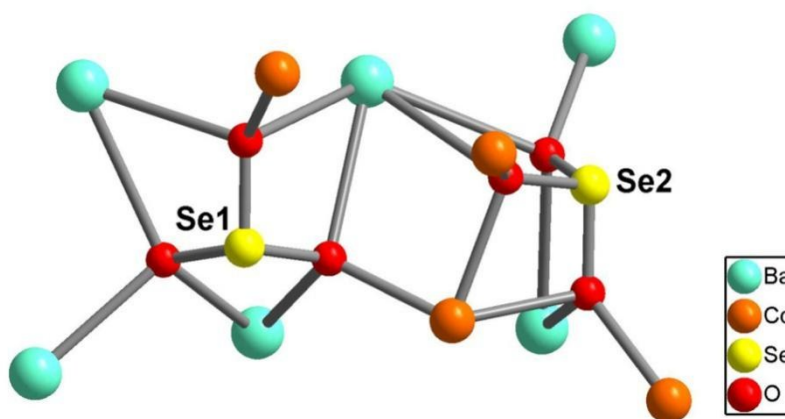

Fig. S7. The coordinate environments of the  $\text{SeO}_3^{2-}$  in **4**.

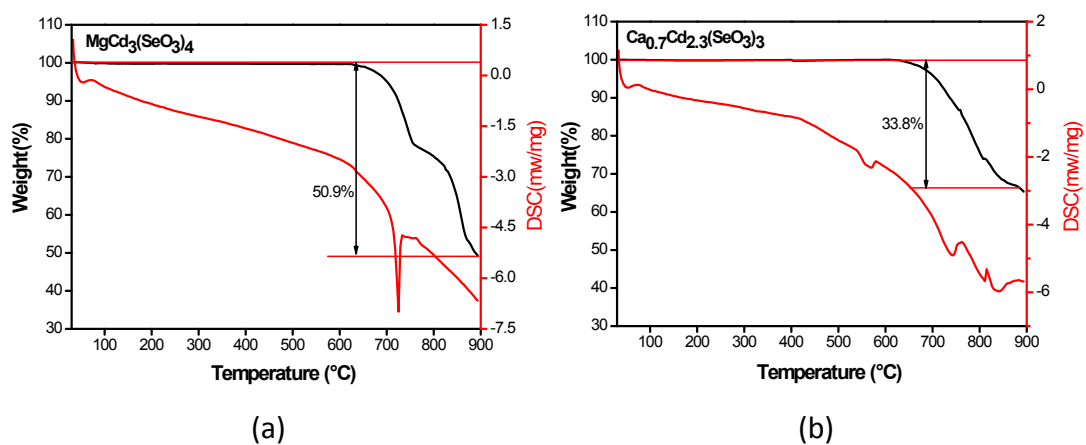

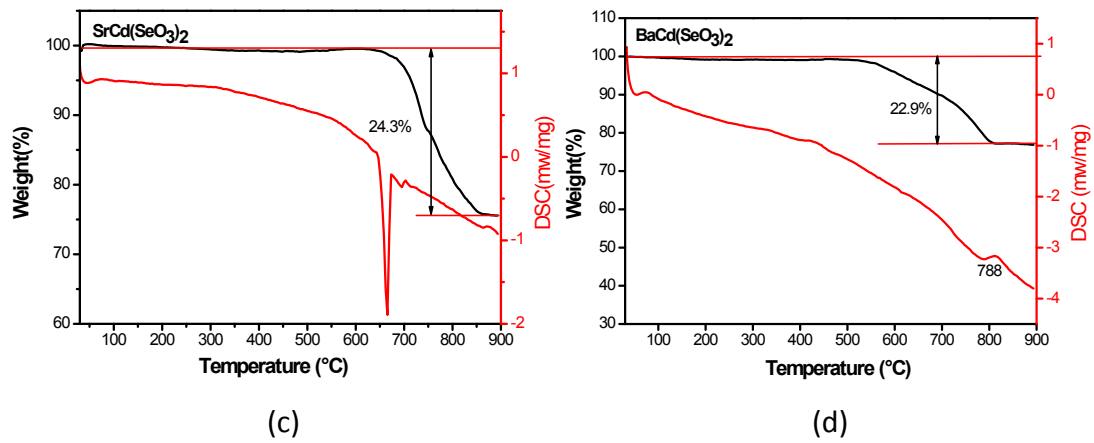

Fig. S8. TGA and DSC curves of 1(a), 2(b), 3(c) and 4(d).

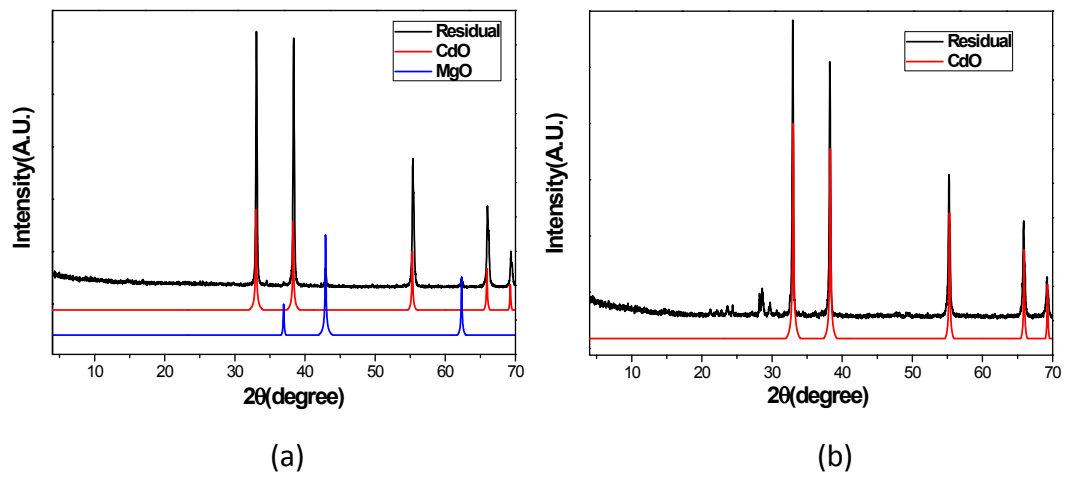

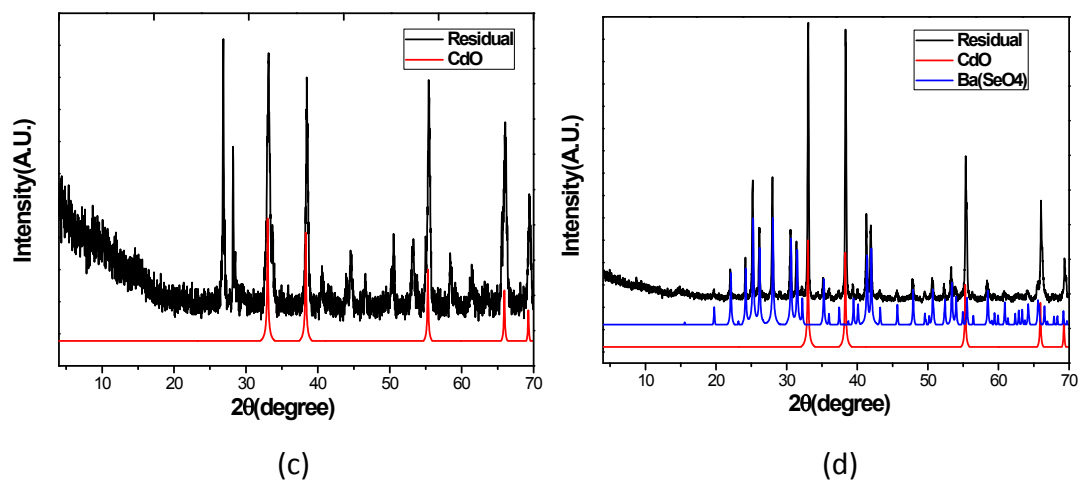

Fig. S9. PXRD powder patterns for the residual of 1(a), 2(b), 3(c) and 4(d).

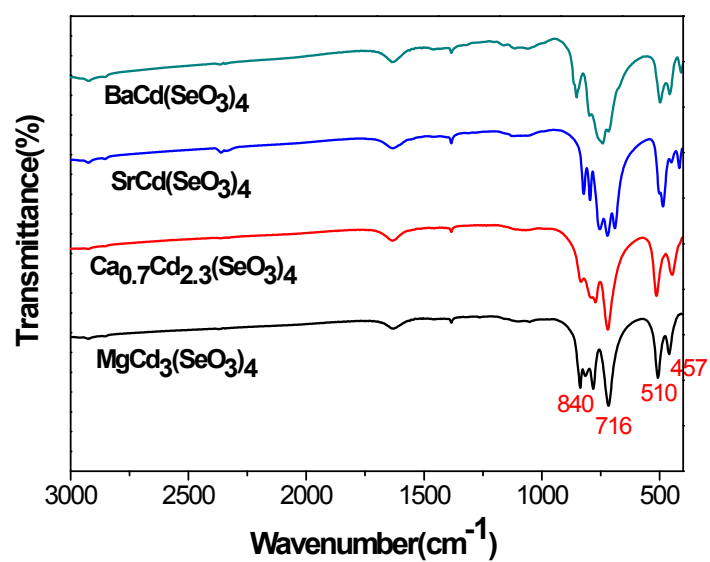

Fig. S10. IR spectrum of 1-4.
